# Supplementary material for: Assessment of mobilization capacity in 10 different ICU scenarios by different professions
Source: PubMed Central journal article supplement (PMC7561080; doi:10.1371/journal.pone.0239853), 2020-10-15
Supplement: pone.0239853.s001.pdf [file pone.0239853.s001.pdf]

# Appendix - Assessment of mobilization capacity in 10 different ICU scenarios by different professions

|                                                           |           |
|-----------------------------------------------------------|-----------|
| <b>APPENDIX 1 – ORIGINAL SURVEY .....</b>                 | <b>2</b>  |
| <b>APPENDIX 2 – DESCRIPTION OF THE SCENARIOS .....</b>    | <b>26</b> |
| SCENARIO 1 - AWAKE & STABLE .....                         | 26        |
| SCENARIO 2 - COMATOSE & MV WITH ETT.....                  | 26        |
| SCENARIO 3 - AWAKE & MV WITH ETT .....                    | 27        |
| SCENARIO 4 - DELIRIUM & MV WITH TC.....                   | 27        |
| SCENARIO 5 - AWAKE & NIV.....                             | 28        |
| SCENARIO 6 - CRRT & MV WITH ETT .....                     | 28        |
| SCENARIO 7 - DELIRIUM & MV WITH ETT .....                 | 29        |
| SCENARIO 8 - PULMONARY UNSTABLE & MV WITH TC .....        | 29        |
| SCENARIO 9 - VASOPRESSORS & MV WITH TC.....               | 30        |
| SCENARIO 10 - AWAKE & SAB.....                            | 30        |
| <b>APPENDIX 3 - REQUIRED STAFF FOR MOBILIZATION.....</b>  | <b>31</b> |
| <b>APPENDIX 4 - MIXED MODEL – ANOVA CALCULATION .....</b> | <b>32</b> |
| <b>APPENDIX 5 - BARRIERS.....</b>                         | <b>33</b> |

**Appendix 1 – Original survey**

**Liebe Kolleginnen und Kollegen**

**Das deutsche Netzwerk Frühmobilisierung führt diese Umfrage vom 1.-30. Juli 2017 durch (die Umfragedauer wurde am 30.6. verlängert). Wir fragen nach der Mobilisierbarkeit von Intensivpatienten. Die Umfrage ist in vier Teile gegliedert.**

**Teil 1 beinhaltet Daten zu Ihrer Intensivstation.**

**Teil 2 umfasst 10 verschiedene Patientenszenarien, bei der eingeschätzt werden soll:**

- a) wie weit die jeweiligen Patienten mobilisiert werden könnten und**
- b) wie viele Mitarbeiter dazu benötigt werden.**

**In jedem Szenario weist der Titel auf die besondere Situation hin, es werden auch detaillierte Angaben gemacht.**

**Teil 3 beinhaltet kurz die häufigsten Barrieren in der Mobilisierbarkeit von Intensivpatienten**

**Teil 4 beinhaltet soziodemographische Daten wie Berufsgruppe usw.**

**Hinweis: Die Umfrage dauert ca. 10-20 Minuten. Ihre Teilnahme erfolgt freiwillig. Die erhobenen Daten werden anonymisiert gespeichert. Die Umfrage wurde von der Ethikkommission der Medizinischen Fakultät der Technischen Universität München begutachtet (161/17 S). Die Ethikkommission erhob keine Einwände gegen die Studie. Mit Ihrer Teilnahme erklären Sie sich mit den Bedingungen einverstanden.**

**Vorab bedanken wir uns für Ihre und Eure Teilnahme.**

## Meine Station

### 1. Ich selbst halte mich ...

- für eine/n Experten/Expertin in Frühmobilisierung
- nicht für eine/n Experten/Expertin in Frühmobilisierung

### 2. Es gibt auf meiner Station Protokolle, bzw. schriftliche Vereinbarungen zu (Mehrfachantwort)

- Analgesie
- Sedierung
- Delirmanagement
- Weaning
- Frühmobilisierung
- tägliche, interprofessionelle Tagesziele
- automatische Anordnung zur Frühmobilisierung

### 3. Ich schätze die bei uns existierenden Protokolle werden in folgendem Umfang umgesetzt (%-Angabe):

0 100

4. Frühmobilisierung gem. DGAI "S2e-Leitlinie: Lagerungstherapie und Frühmobilisation zur Prophylaxe oder Therapie von pulmonalen Funktionsstörungen" ist definiert als Mobilisierung

- ab Intensivaufnahme
- innerhalb 72h nach Intensivaufnahme
- innerhalb einer Woche nach Intensivaufnahme
- sobald der Patient stabil (z.B. katecholaminfrei) ist

## Hintergrundinformation

In den folgenden Szenarios werden Patienten unterschiedlich beschrieben. Damit Sie wissen, worum es geht, sind hier die Definitionen nochmal gelistet

### Bewusstsein

**Richmond Agitation Sedation Scale:**

#### **RASS+ 4**

**Sehr streitlustig: Offene Streitlust, gewalttätig, unmittelbare Gefahr für das Personal**

#### **RASS + 3**

**Sehr agitiert: Zieht oder entfernt Schläuche oder Katheter; aggressiv**

#### **RASS + 2**

**Agitiert: Häufige ungezielte Bewegung, atmet gegen das Beatmungsgerät**

#### **RASS + 1**

**Unruhig: Ängstlich aber Bewegungen nicht aggressiv oder lebhaft**

#### **RASS 0**

**Aufmerksam ruhig**

#### **RASS -1**

**Schläfrig: Nicht ganz aufmerksam, aber erwacht anhaltend durch Stimme (>10s)**

#### **RASS -2**

**Leichte Sedierung: Erwacht kurz mit Augenkontakt durch Stimme (<10s)**

#### **RASS -3**

**Mäßige Sedierung: Bewegung oder Augenöffnung durch Stimme (aber keinen Augenkontakt)**

#### **RASS -4**

**Tiefe Sedierung: ø Reaktion auf Stimme, aber Bewegung o. Augenöffnung durch körperlichen Reiz**

#### **RASS -5**

**Nicht erweckbar: Keine Reaktion auf Stimme oder körperlichen Reiz**

### Schmerzen

Es stehen verschiedene Skalen zur Verfügung: hier erfolgt die Einteilung in

- Keine Schmerzen
- Leichte Schmerzen
- Mittlere Schmerzen
- Starke Schmerzen

### Delir

Ein Delir / Verwirrtheit kann mit der Confusion Assessment Method for the Intensive Care Unit

**(CAM-ICU) festgestellt werden**

- CAM-ICU positiv = Delir vorhanden
- CAM-ICU negativ = Delir nicht vorhanden
- CAM-ICU nicht beurteilbar (z.B. RASS -4/-5)

Ein Delir kann weiterhin hyperaktiv sein (unruhiger Patient), aber auch hypoaktiv (ruhig, wirkt in sich gekehrt)

**Beweglichkeit: Kraftgradeinteilung**

- **0/5: keine muskuläre Aktivität, komplette Lähmung**
- **1/5: sichtbare und/oder tastbare Kontraktion ohne Bewegung**
- **2/5: Bewegung unter Ausschaltung der Schwerkraft möglich**
- **3/5: Bewegung gegen die Schwerkraft gerade noch möglich**
- **4/5: Bewegung gegen leichten Widerstand möglich**
- **5/5: Normale Kraft**

**Alle Patienten wurden im Verlauf bereits mindestens einmal mobilisiert, sei es passiv im Bett oder bis hin zu aktiver Mobilisierung aus dem Bett.**



## Szenario 1: Wache, spontan atmende, stabile Patientin

**Weibliche Patientin, 58 Jahre alt, Lungenversagen, 5. Tag.**

**Bewusstsein: aufmerksam ruhig (RASS 0)**

**Delir: kein Delir (CAM-ICU negativ)**

**Schmerz: kaum vorhanden**

**Bewegung: voll beweglich, normale Kraft (Kraftgrad 5/5)**

**Hämodynamik: Hyperton, "stabil"**

**Pulmonal: atmet spontan, 4l O2, O2-Sättigung 97%**

**Zu-/Ableitungen: Sauerstoffbrille, ZVK, Arterie, DK, Ernährungssonde**

5. Realistisch würde ich versuchen diese Patientin bis Stufe ... (auswählen) zu mobilisieren

6. Ich benötige dazu ... (Anzahl der jeweiligen Mitarbeiter, inkl. der eigenen Person). Hinweis: Alle ihre Antworten werden zur Gesamtsumme addiert für die Anzahl die Sie für notwendig halten (bei all diesen Fragen).

|                                     | 0                     | 1                     | 2                     | 3                     |
|-------------------------------------|-----------------------|-----------------------|-----------------------|-----------------------|
| Ärzte                               | <input type="radio"/> | <input type="radio"/> | <input type="radio"/> | <input type="radio"/> |
| Pflegende oder<br>Physiotherapeuten | <input type="radio"/> | <input type="radio"/> | <input type="radio"/> | <input type="radio"/> |
| Physiotherapeuten                   | <input type="radio"/> | <input type="radio"/> | <input type="radio"/> | <input type="radio"/> |
| Pflegende                           | <input type="radio"/> | <input type="radio"/> | <input type="radio"/> | <input type="radio"/> |

Sonstiges (bitte angeben)

## Szenario 2: endotracheal intubierter, kontrolliert beatmeter, komatöser Patient

**Männlicher Patient, 74 Jahre alt, Schlaganfall nach OP an Bauchaortenaneurysma, 10. Tag.**

**Bewusstsein: nicht erweckbar (RASS -5)**

**Delir: nicht beurteilbar**

**Schmerz: Schmerz nicht beurteilbar**

**Bewegung: ohne Tonus, keine muskuläre Aktivität, komplette Lähmung (Kraftgrad 0/5)**

**Hämodynamik: leicht instabil (Noradrenalin 0,07 µg/kg/min = ca. 5µg/min)**

**Pulmonal: beatmet, stabil, pO<sub>2</sub>/FiO<sub>2</sub>=270 bei FiO<sub>2</sub> 0.4, Sauerstoffsättigung 98%**

**Zu-/Ableitungen: endotrachealer Tubus, ZVK, Arterie, DK, Ernährungssonde**

7. Realistisch würde ich versuchen diese Patientin bis Stufe ... (auswählen) zu mobilisieren

- 0 Keine Mobilisierung
- 1 Im Bett sitzen, bzw. Übungen
- 2 Passiv in einen Stuhl bewegen
- 3 Auf der Bettkante sitzen
- 4 Stehen vor dem Bett
- 5 Aktiver Transfer in einen Stuhl
- 6 Auf der Stelle gehen (zwei Schritte jedes Bein)
- 7 Gehen mit ≥ 2 Personen > 5m
- 8 Gehen mit 1 Person > 5m
- 9 Gehen mit Hilfsmittel > 5m
- 10 Unabhängiges Gehen

8. Ich benötige dazu ... (Anzahl der jeweiligen Mitarbeiter)

|                                     | 0                     | 1                     | 2                     | 3                     |
|-------------------------------------|-----------------------|-----------------------|-----------------------|-----------------------|
| Ärzte                               | <input type="radio"/> | <input type="radio"/> | <input type="radio"/> | <input type="radio"/> |
| Pflegende oder<br>Physiotherapeuten | <input type="radio"/> | <input type="radio"/> | <input type="radio"/> | <input type="radio"/> |
| Physiotherapeuten                   | <input type="radio"/> | <input type="radio"/> | <input type="radio"/> | <input type="radio"/> |
| Pflegende                           | <input type="radio"/> | <input type="radio"/> | <input type="radio"/> | <input type="radio"/> |

Sonstiges (bitte angeben)

Szenario 3: wacher, endotracheal intubierter, beatmeter Patient

**Männlicher Patient, 68 Jahre alt, Aspirationspneumonie, Tag 4**

**Gewicht & Größe: "normal"**

**Bewusstsein: aufmerksam ruhig (RASS 0)**

**Delir: nicht vorhanden (CAM-ICU negativ)**

**Schmerz: schmerzfrei**

**Bewegung: leichte Einschränkung, Bewegung gegen leichten Widerstand möglich (Kraftgrad 4/5)**

**Hämodynamik: "stabil"**

**Pulmonal: beatmet, stabil, pO<sub>2</sub>/FiO<sub>2</sub>=180 bei FiO<sub>2</sub> 0.5, Sauerstoffsättigung 97%**

**Zu-/Ableitungen: endotrachealer Tubus, ZVK, Arterie, DK, Ernährungssonde**

9. Realistisch würde ich versuchen diese Patientin bis Stufe ... (auswählen) zu mobilisieren

10. Ich benötige dazu ... (Anzahl der jeweiligen Mitarbeiter)

|                                     | 0                     | 1                     | 2                     | 3                     |
|-------------------------------------|-----------------------|-----------------------|-----------------------|-----------------------|
| Ärzte                               | <input type="radio"/> | <input type="radio"/> | <input type="radio"/> | <input type="radio"/> |
| Pflegende oder<br>Physiotherapeuten | <input type="radio"/> | <input type="radio"/> | <input type="radio"/> | <input type="radio"/> |
| Physiotherapeuten                   | <input type="radio"/> | <input type="radio"/> | <input type="radio"/> | <input type="radio"/> |
| Pflegende                           | <input type="radio"/> | <input type="radio"/> | <input type="radio"/> | <input type="radio"/> |

Sonstiges (bitte angeben)

Szenario 4: tracheostomierte, assistiert beatmete Patientin, eingeschränkt mobil

**Weibliche Patientin, 53 Jahre alt, Z.n. Sepsis, 8. Tag**

**Bewusstsein: schläfrig (RASS -1)**

**Delir: vorhanden (CAM-ICU positiv: hypoaktiv)**

**Schmerz: schmerzfrei**

**Bewegung: leichte Einschränkung, Bewegung gegen leichten Widerstand möglich (Kraftgrad 4/5)**

**Hämodynamik: "stabil"**

**Pulmonal: beatmet, stabil, pO<sub>2</sub>/FiO<sub>2</sub>=170 bei FiO<sub>2</sub> 0.5, Sauerstoffsättigung 97%**

**Zu-/Ableitungen: Trachealkanüle, ZVK, Arterie, DK, Ernährungssonde**

11. Realistisch würde ich versuchen diese Patientin bis Stufe ... (auswählen) zu mobilisieren

12. Ich benötige dazu ... (Anzahl der jeweiligen Mitarbeiter)

|                                     | 0                     | 1                     | 2                     | 3                     |
|-------------------------------------|-----------------------|-----------------------|-----------------------|-----------------------|
| Ärzte                               | <input type="radio"/> | <input type="radio"/> | <input type="radio"/> | <input type="radio"/> |
| Pflegende oder<br>Physiotherapeuten | <input type="radio"/> | <input type="radio"/> | <input type="radio"/> | <input type="radio"/> |
| Physiotherapeuten                   | <input type="radio"/> | <input type="radio"/> | <input type="radio"/> | <input type="radio"/> |
| Pflegende                           | <input type="radio"/> | <input type="radio"/> | <input type="radio"/> | <input type="radio"/> |

Sonstiges (bitte angeben)

## Szenario 5: assistiert beatmete Patientin mit nicht-invasiver Maskenbeatmung

**Weibliche Patientin, 72 Jahre alt, exarzerbierte COPD, 20. Tag**

**Bewusstsein: aufmerksam ruhig (RASS 0)**

**Delir: nicht vorhanden (CAM-ICU negativ)**

**Schmerz: schmerzfrei**

**Bewegung: leichte Einschränkung, Bewegung gegen leichten Widerstand möglich (Kraftgrad 4/5)**

**Hämodynamik: "stabil"**

**Pulmonal: beatmet (NIV-Maske), stabil, pO<sub>2</sub>/FiO<sub>2</sub>=130 bei FiO<sub>2</sub> 0.6, Sauerstoffsättigung 94%**

**Zu-/Ableitungen: NIV, ZVK, Arterie, DK, Ernährungssonde**

13. Realistisch würde ich versuchen diese Patientin bis Stufe ... (auswählen) zu mobilisieren

14. Ich benötige dazu ... (Anzahl der jeweiligen Mitarbeiter)

|                                     | 0                     | 1                     | 2                     | 3                     |
|-------------------------------------|-----------------------|-----------------------|-----------------------|-----------------------|
| Ärzte                               | <input type="radio"/> | <input type="radio"/> | <input type="radio"/> | <input type="radio"/> |
| Pflegende oder<br>Physiotherapeuten | <input type="radio"/> | <input type="radio"/> | <input type="radio"/> | <input type="radio"/> |
| Physiotherapeuten                   | <input type="radio"/> | <input type="radio"/> | <input type="radio"/> | <input type="radio"/> |
| Pflegende                           | <input type="radio"/> | <input type="radio"/> | <input type="radio"/> | <input type="radio"/> |

Sonstiges (bitte angeben)

Szenario 6: endotracheal intubierter, assistiert beatmeter Patient, laufendes Nierenersatzverfahren

**Männlicher Patient, 50 Jahre alt, Pneumonie, 16. Tag**

**Bewusstsein: aufmerksam ruhig (RASS 0)**

**Delir: nicht vorhanden (CAM-ICU negativ)**

**Schmerz: schmerzfrei**

**Bewegung: Bewegung gegen leichten Widerstand möglich (Kraftgrad 4/5)**

**Hämodynamik: "stabil"**

**Pulmonal: beatmet, stabil,  $pO_2/FiO_2=230$  bei  $FiO_2$  0.45, Sauerstoffsättigung 98%**

**Zu-/Ableitungen: endotrachealer Tubus, laufendes Nierenersatzverfahren (Shaldonkatheter in Subclavia) das nicht zur Mobilisierung diskonnektiert wird, ZVK, Arterie, DK, Ernährungssonde**

15. Realistisch würde ich versuchen diese Patientin bis Stufe ... (auswählen) zu mobilisieren

16. Ich benötige dazu ... (Anzahl der jeweiligen Mitarbeiter)

|                                  | 0                     | 1                     | 2                     | 3                     |
|----------------------------------|-----------------------|-----------------------|-----------------------|-----------------------|
| Ärzte                            | <input type="radio"/> | <input type="radio"/> | <input type="radio"/> | <input type="radio"/> |
| Pflegende oder Physiotherapeuten | <input type="radio"/> | <input type="radio"/> | <input type="radio"/> | <input type="radio"/> |
| Physiotherapeuten                | <input type="radio"/> | <input type="radio"/> | <input type="radio"/> | <input type="radio"/> |
| Pflegende                        | <input type="radio"/> | <input type="radio"/> | <input type="radio"/> | <input type="radio"/> |

Sonstiges (bitte angeben)

Szenario 7: endotracheal intubierte, assistiert beatmete Patientin im hyperaktiven Delir

**Weibliche Patientin, 59 Jahre alt, Lungenversagen, 4. Tag**

**Bewusstsein: agitiert (RASS +2)**

**Delir: hyperaktives Delir vorhanden (CAM-ICU positiv)**

**Schmerz: leicht vorhanden**

**Bewegung: normale Kraft (Kraftgrad 5/5)**

**Hämodynamik: Hyperton, "stabil"**

**Pulmonal: beatmet, instabil,  $pO_2/FiO_2=170$  bei  $FiO_2$  0.5, Sauerstoffsättigung 97%**

**Zu-/Ableitungen: endotrachealer Tubus, ZVK, Arterie, DK, Ernährungssonde**

17. Realistisch würde ich versuchen diese Patientin bis Stufe ... (auswählen) zu mobilisieren

18. Ich benötige dazu ... (Anzahl der jeweiligen Mitarbeiter)

|                                     | 0                     | 1                     | 2                     | 3                     |
|-------------------------------------|-----------------------|-----------------------|-----------------------|-----------------------|
| Ärzte                               | <input type="radio"/> | <input type="radio"/> | <input type="radio"/> | <input type="radio"/> |
| Pflegende oder<br>Physiotherapeuten | <input type="radio"/> | <input type="radio"/> | <input type="radio"/> | <input type="radio"/> |
| Physiotherapeuten                   | <input type="radio"/> | <input type="radio"/> | <input type="radio"/> | <input type="radio"/> |
| Pflegende                           | <input type="radio"/> | <input type="radio"/> | <input type="radio"/> | <input type="radio"/> |

Sonstiges (bitte angeben)

Szenario 8: tracheostomiert assistiert beatmeter, pulmonal instabiler Patient

**Männlicher Patient, 70 Jahre alt, Pneumonie, 9. Tag**

**Bewusstsein: leichte Sedierung (RASS -2),**

**Delir: nicht vorhanden (CAM-ICU negativ)**

**Schmerz: leichte Schmerzen**

**Bewegung: normale Kraft (Kraftgrad 5/5)**

**Hämodynamik: "stabil"**

**Pulmonal: beatmet, stabil,  $pO_2/FiO_2=130$  bei  $FiO_2$  0.8, Sauerstoffsättigung 95%**

**Zu-/Ableitungen: Tracheostomiert, ZVK, Arterie, DK, Ernährungssonde**

19. Realistisch würde ich versuchen diese Patientin bis Stufe ... (auswählen) zu mobilisieren

20. Ich benötige dazu ... (Anzahl der jeweiligen Mitarbeiter)

|                                     | 0                     | 1                     | 2                     | 3                     |
|-------------------------------------|-----------------------|-----------------------|-----------------------|-----------------------|
| Ärzte                               | <input type="radio"/> | <input type="radio"/> | <input type="radio"/> | <input type="radio"/> |
| Pflegende oder<br>Physiotherapeuten | <input type="radio"/> | <input type="radio"/> | <input type="radio"/> | <input type="radio"/> |
| Physiotherapeuten                   | <input type="radio"/> | <input type="radio"/> | <input type="radio"/> | <input type="radio"/> |
| Pflegende                           | <input type="radio"/> | <input type="radio"/> | <input type="radio"/> | <input type="radio"/> |

Sonstiges (bitte angeben)



## Szenario 9: tracheostomiert assistiert beatmete Patientin mit Katecholaminen

**Weibliche Patientin, 61 Jahre alt, Sepsis, 6. Tag**

**Bewusstsein: schläfrig (RASS -1)**

**Delir: hypoaktiv vorhanden (CAM-ICU positiv)**

**Schmerz: schmerzfrei**

**Bewegung: Bewegung gegen leichten Widerstand möglich (Kraftgrad 4/5)**

**Hämodynamik: "stabil" bei hohen Dosen Arterenol (0,4 µg/kg/min = ca. 28µg/min), Dobutamin (12 µg/kg/min = ca. 0.8mg/min)**

**Pulmonal: beatmet, stabil, pO<sub>2</sub>/FiO<sub>2</sub>=180 bei FiO<sub>2</sub> 0.5, Sauerstoffsättigung 97%**

**Zu-/Ableitungen: Trachealkanüle, ZVK, Arterie, DK, Ernährungssonde**

21. Realistisch würde ich versuchen diese Patientin bis Stufe ... (auswählen) zu mobilisieren

22. Ich benötige dazu ... (Anzahl der jeweiligen Mitarbeiter)

|                                     | 0                     | 1                     | 2                     | 3                     |
|-------------------------------------|-----------------------|-----------------------|-----------------------|-----------------------|
| Ärzte                               | <input type="radio"/> | <input type="radio"/> | <input type="radio"/> | <input type="radio"/> |
| Pflegende oder<br>Physiotherapeuten | <input type="radio"/> | <input type="radio"/> | <input type="radio"/> | <input type="radio"/> |
| Physiotherapeuten                   | <input type="radio"/> | <input type="radio"/> | <input type="radio"/> | <input type="radio"/> |
| Pflegende                           | <input type="radio"/> | <input type="radio"/> | <input type="radio"/> | <input type="radio"/> |

Sonstiges (bitte angeben)

## Szenario 10: Patientin mit SAB

**Weibliche Patientin, 51 Jahre alt, leichte Subarachnoidalblutung (Hunt&Hess 2), Tag 5, keine Hirndrücke, gering erhöhte Flüsse**

**Bewusstsein: schläfrig (RASS -1)**

**Delir: Delir nein (CAM-ICU negativ)**

**Schmerz: Schmerz VAS 3**

**Bewegung: normale muskuläre Kraft, (Kraftgrad 5/5)**

**Hämodynamik: "stabil"**

**Pulmonal: Spontanatmend, Sauerstoffsättigung 98%**

**Zu-/Ableitungen: ZVK, Arterie, DK, Hirndrucksonde**

23. Realistisch würde ich versuchen diese Patientin bis Stufe ... (auswählen) zu mobilisieren

24. Ich benötige dazu ... (Anzahl der jeweiligen Mitarbeiter)

|                                     | 0                     | 1                     | 2                     | 3                     |
|-------------------------------------|-----------------------|-----------------------|-----------------------|-----------------------|
| Ärzte                               | <input type="radio"/> | <input type="radio"/> | <input type="radio"/> | <input type="radio"/> |
| Pflegende oder<br>Physiotherapeuten | <input type="radio"/> | <input type="radio"/> | <input type="radio"/> | <input type="radio"/> |
| Physiotherapeuten                   | <input type="radio"/> | <input type="radio"/> | <input type="radio"/> | <input type="radio"/> |
| Pflegende                           | <input type="radio"/> | <input type="radio"/> | <input type="radio"/> | <input type="radio"/> |

Sonstiges (bitte angeben)

Unten ist eine Liste möglicher Barrieren zur Mobilisierung. Bitte klicken Sie die 3 aus Ihrer Sicht wichtigsten Barrieren an.

25. Die 3 wichtigsten Barrieren sind ...

- Häodynamische/pulmonale Instabilität
- Zu- und Ableitungen
- Zu tiefe Sedierung
- Hyperaktives Delir
- Mangel an Pflegepersonal
- Mangel an Physiotherapeuten
- Mangel an Therapeuten
- Mangel an Ärzten
- Fehlendes Equipment
- Fehlendes Mobilisierungsprotokoll
- Zu frühe Verlegung der Patienten
- Unklare Verantwortungen
- Kommunikation zwischen den Berufsgruppen
- Keine interprofessionelle Visiten
- Keine Tagesziele
- Fehlende Kultur der Mobilität
- Sicherheitsbedenken
- Zu wenig Wissen und Training
- Zu wenig Unterstützung
- Unwillen, das Verhalten zu ändern

## Soziodemographische Daten

### 26. Mein Alter

- <35
- 35-48
- 49-67

### 27. Meine Berufserfahrung auf Intensivstation

- zurzeit noch in Ausbildung/Studium
- < 1 Jahr
- 1-4 Jahre
- 5-10 Jahre
- > 10 Jahre
- > 20 Jahre

### 28. Ich arbeite als ...

- Atmungstherapeut
- Assistenzarzt in Weiterbildung
- Ergotherapeut
- Facharzt mit abgeschlossener Zusatzweiterbildung Intensivmedizin
- Facharzt ohne abgeschlossener Zusatzweiterbildung Intensivmedizin
- Oberarzt auf einer Intensivstation (>50% auf Intensivstation tätig)
- Chefarzt
- Pflegende
- Pflegende (Fachweiterbildung A&I, 2-jährig)
- Physiotherapeut
- Pflege sonstige
- Sonstiges (bitte angeben)

29. Ich arbeite in

- Deutschland
- Österreich
- Schweiz
- Luxemburg
- Sonstiges Land

## In welchem Bundesland arbeiten Sie?

30. In welchem Bundesland arbeiten Sie?

- Baden-Württemberg
- Bayern
- Berlin
- Brandenburg
- Bremen
- Hamburg
- Hessen
- Mecklenburg-Vorpommern
- Niedersachsen
- Nordrhein-Westfalen
- Rheinland-Pfalz
- Saarland
- Sachsen
- Sachsen-Anhalt
- Schleswig-Holstein
- Thüringen

## In welchem österreichischem Bundesland arbeiten Sie?

31. In welchem Bundesland arbeiten Sie?

- Vorarlberg
- Tirol
- Salzburg
- Oberösterreich
- Kärnten
- Steiermark
- Burgenland
- Niederösterreich
- Wien

## In welchem Kanton arbeiten Sie?

### 32. In welchem Kanton arbeiten Sie?

- Aargau
- Appenzell Ausserrhoden
- Appenzell Innerrhoden
- Basel-Land
- Basel-Stadt
- Bern
- Fribourg
- Genève
- Glarus
- Graubünden
- Jura
- Luzern
- Neuchâtel
- Nidwalden
- Obwalden
- St.Gallen
- Schaffhausen
- Schwyz
- Solothurn
- Thurgau
- Ticino
- Uri
- Vaud
- Valais
- Zug
- Zürich



Vielen Dank

Wenn Sie bereit sind an Folgebefragungen teilzunehmen, drücken Sie bitte den unten stehenden Link. Dieser öffnet eine von dieser Umfrage unabhängige Mailingliste, wo Sie ihre Emailadresse eintragen können. Damit bleiben Ihre Antworten garantiert anonymisiert. Wir würden uns freuen, wenn Sie bereit wären, sich einzutragen.

Link: <https://lists.lrz.de/mailman/listinfo/mob-icu> (Es ist ausreichend lediglich die Emailadresse einzugeben und abzuschicken; die Angabe des Namens oder eines von Ihnen gewünschten Passwortes ist freiwillig.)

Sie haben uns mit der Beantwortung dieser Fragen sehr geholfen!  
Danke vielmals!

## Appendix 2 – Description of the scenarios

### Scenario 1 - Awake & stable

|                   |                                                                                      |
|-------------------|--------------------------------------------------------------------------------------|
| Headline          | awake, spontaneous breathing, stable patient                                         |
| Description       | female patient, 58 years old with lung failure, 5th day of ICU                       |
| Consciousness     | attentive, untroubled (RASS 0)                                                       |
| Delirium          | no delirium (CAM-ICU negative)                                                       |
| Pain              | hardly present                                                                       |
| Mobility/Strength | fully mobile, normal strength (MRC 5/5)                                              |
| Hemodynamics      | hypertensive, “stable”                                                               |
| Pulmonary         | breathing spontaneously, 4l O <sub>2</sub> /min, O <sub>2</sub> -Saturation 97%      |
| Lines             | nasal oxygen, central venous catheter, arterial line, urinary catheter, feeding tube |

### Scenario 2 - Comatose & MV with ETT

|                   |                                                                                                                        |
|-------------------|------------------------------------------------------------------------------------------------------------------------|
| Headline          | endotracheally intubated, mechanically ventilated, comatose patient                                                    |
| Description       | male patient, 74 years old with a stroke after surgery of an abdominal aortic aneurysm, 10th day of ICU                |
| Consciousness     | not arousable (RASS -5)                                                                                                |
| Delirium          | not evaluable                                                                                                          |
| Pain              | not evaluable                                                                                                          |
| Mobility/Strength | without tonicity, no muscle activity, completely paralysis (MRC 0/5)                                                   |
| Hemodynamics      | slightly unstable (norepinephrine 0.07 µg/kg/min = ca. 0.5 µg/min)                                                     |
| Pulmonary         | ventilated, stable, pO <sub>2</sub> /FiO <sub>2</sub> = 270 with 0.4 FiO <sub>2</sub> , O <sub>2</sub> -Saturation 98% |
| Lines             | endotracheal tube, central venous catheter, arterial line, urinary catheter, feeding tube                              |

### Scenario 3 - Awake & MV with ETT

|                   |                                                                                                                        |
|-------------------|------------------------------------------------------------------------------------------------------------------------|
| Headline          | awake, endotracheally intubated, mechanically ventilated patient                                                       |
| Description       | male patient, 68 years old, aspiration pneumonia, 4th day of ICU, normal height & weight                               |
| Consciousness     | alert & calm (RASS 0)                                                                                                  |
| Delirium          | no delirium (CAM-ICU negative)                                                                                         |
| Pain              | without pain                                                                                                           |
| Mobility/Strength | light restriction, mobility against light resistance possible (MRC 4/5)                                                |
| Hemodynamics      | stable                                                                                                                 |
| Pulmonary         | ventilated, stable, pO <sub>2</sub> / FiO <sub>2</sub> = 180 with FiO <sub>2</sub> 0.5, O <sub>2</sub> -Saturation 97% |
| Lines             | endotracheal tube, central venous catheter, arterial line, urinary catheter, feeding tube                              |

### Scenario 4 - Delirium & MV with TC

|                   |                                                                                                                      |
|-------------------|----------------------------------------------------------------------------------------------------------------------|
| Headline          | tracheotomized, assisted ventilated patient, restricted mobility                                                     |
| Description       | female patient, 53 years old, status post sepsis, 8th day of ICU                                                     |
| Consciousness     | drowsy (RASS -1)                                                                                                     |
| Delirium          | delirium present (CAM-ICU positive, hypoactive)                                                                      |
| Pain              | painless                                                                                                             |
| Mobility/Strength | light restriction, mobility against light resistance (MRC 4/5)                                                       |
| Hemodynamics      | stable                                                                                                               |
| Pulmonary         | ventilated, stable, pO <sub>2</sub> /FiO <sub>2</sub> = 170 by FiO <sub>2</sub> 0.5%, O <sub>2</sub> -Saturation 97% |
| Lines             | tracheostomy cannula, central venous catheter, arterial line, urinary catheter, feeding tube                         |

### Scenario 5 - Awake & NIV

|                   |                                                                                                                                   |
|-------------------|-----------------------------------------------------------------------------------------------------------------------------------|
| Headline          | assistent ventilated patient with non-invasive mask ventilation                                                                   |
| Description       | female patient, 72 years old, acute exacerbation of COPD, 20th day of ICU                                                         |
| Consciousness     | alert & calm (RASS 0)                                                                                                             |
| Delirium          | no delirium (CAM-ICU negative)                                                                                                    |
| Pain              | painless                                                                                                                          |
| Mobility/Strength | light restriction, mobility against light resistance (MRC 4/5)                                                                    |
| Hemodynamics      | stable                                                                                                                            |
| Pulmonary         | ventilated (NIV-mask), stable, pO <sub>2</sub> /FiO <sub>2</sub> = 130 with 0.6 FiO <sub>2</sub> , O <sub>2</sub> -Saturation 94% |
| Lines             | NIV, central venous catheter, arterial line, urinary catheter, feeding tube                                                       |

### Scenario 6 - CRRT & MV with ETT

|                   |                                                                                                                                                                                                             |
|-------------------|-------------------------------------------------------------------------------------------------------------------------------------------------------------------------------------------------------------|
| Headline          | endotracheally intubated, assistant ventilation, with renal replacement therapy                                                                                                                             |
| Description       | male patient, 50 years old, pneumonia, 16th day of ICU                                                                                                                                                      |
| Consciousness     | alert & calm (RASS 0)                                                                                                                                                                                       |
| Delirium          | no delirium (CAM-ICU negative)                                                                                                                                                                              |
| Pain              | painless                                                                                                                                                                                                    |
| Mobility/Strength | mobility against light resistance possible (MRC 4/5)                                                                                                                                                        |
| Hemodynamics      | stable                                                                                                                                                                                                      |
| Pulmonary         | ventilated, stable, pO <sub>2</sub> /FiO <sub>2</sub> = 230 with FiO <sub>2</sub> 0.45, O <sub>2</sub> -Saturation 98%                                                                                      |
| Lines             | endotracheal tube, running renal replacement therapy (shaldon catheter in the subclavian vein) not disconnected during mobilization, central venous catheter, arterial line, urinary catheter, feeding tube |

### Scenario 7 - Delirium & MV with ETT

|                   |                                                                                                                       |
|-------------------|-----------------------------------------------------------------------------------------------------------------------|
| Headline          | endotracheally intubated, assistant ventilated patient with hyperactive delirium                                      |
| Description       | female patient, 59 years old, lung failure, 4th day of ICU                                                            |
| Consciousness     | agitated (RASS +2)                                                                                                    |
| Delirium          | hyperactive delirium (CAM-ICU positive)                                                                               |
| Pain              | slightly present                                                                                                      |
| Mobility/Strength | normal strength (MRC 5/5)                                                                                             |
| Hemodynamics      | hypertensive, stable                                                                                                  |
| Pulmonary         | ventilated, stable, pO <sub>2</sub> / FiO <sub>2</sub> = 170 by FiO <sub>2</sub> 0.5%, O <sub>2</sub> -Saturation 97% |
| Lines             | endotracheal tube, central venous catheter, arterial line, urinary catheter, feeding tube                             |

### Scenario 8 - Pulmonary unstable & MV with TC

|                   |                                                                                                                         |
|-------------------|-------------------------------------------------------------------------------------------------------------------------|
| Headline          | tracheotomized, assistant ventilated, pulmonary unstable patient                                                        |
| Description       | male patient, 70 years old, pneumonia, 9th day of ICU                                                                   |
| Consciousness     | light sedation (RASS -2)                                                                                                |
| Delirium          | no delirium, (CAM-ICU negative)                                                                                         |
| Pain              | slightly present                                                                                                        |
| Mobility/Strength | normal strength (MRC 5/5)                                                                                               |
| Hemodynamics      | stable                                                                                                                  |
| Pulmonary         | ventilated, unstable, pO <sub>2</sub> /FiO <sub>2</sub> = 130 with FiO <sub>2</sub> 0.8, O <sub>2</sub> -Saturation 95% |
| Lines             | tracheostomy cannula, central venous catheter, arterial line, urinary catheter, feeding tube                            |

### Scenario 9 - Vasopressors & MV with TC

|                   |                                                                                                                                   |
|-------------------|-----------------------------------------------------------------------------------------------------------------------------------|
| Headline          | tracheotomized, assistant ventilated patient with catecholamines                                                                  |
| Description       | female patient, 61 years old, sepsis, 6th day of ICU                                                                              |
| Consciousness     | drowsy (RASS -1)                                                                                                                  |
| Delirium          | hypoactive, present (CAM-ICU positive)                                                                                            |
| Pain              | painless                                                                                                                          |
| Mobility/Strength | mobility against light resistance possible (4/5)                                                                                  |
| Hemodynamics      | "stable" with high doses of norepinephrine (0.4 µg/kg/min = approx. 28 µg/min) and dobutamine (12 µg/kg/min = approx. 0.8 mg/min) |
| Pulmonary         | ventilated, stable, pO <sub>2</sub> / FiO <sub>2</sub> = 180 with FiO <sub>2</sub> 0.5, O <sub>2</sub> -Saturation 97%            |
| Lines             | tracheostomy cannula, central venous catheter, arterial line, urinary catheter, feeding tube                                      |

### Scenario 10 - Awake & SAB

|                   |                                                                                                                                                         |
|-------------------|---------------------------------------------------------------------------------------------------------------------------------------------------------|
| Headline          | patient with SAB                                                                                                                                        |
| Description       | female patient, 51 years old, light subarachnoidal hemorrhage (Hunt&Hess 2), 5th day of ICU, no intracranial pressure, slightly increased arterial flow |
| Consciousness     | sleepy (RASS -1)                                                                                                                                        |
| Delirium          | no delirium (CAM-ICU negative)                                                                                                                          |
| Pain              | slightly present (VAS 3)                                                                                                                                |
| Mobility/Strength | normal muscular strength (MRC 5/5)                                                                                                                      |
| Hemodynamics      | stable                                                                                                                                                  |
| Pulmonary         | spontaneous breathing, O <sub>2</sub> -Saturation 98%                                                                                                   |
| Lines             | central venous catheter, arterial line, urinary catheter, intracranial pressure probe                                                                   |

### Appendix 3 - Required staff for mobilization

| Scenario/<br>Profession | Total <sup>a</sup> | Physicians | Nurses     | Physical<br>Therapists | Other<br>Specialists <sup>b</sup> | p-value |
|-------------------------|--------------------|------------|------------|------------------------|-----------------------------------|---------|
| 1 Awake                 | 2 (1-3)            | 2 (1-2.75) | 2 (1-3)    | 1.5 (1-2)              | 2 (1-3)                           | 0.179   |
| 2 Coma                  | 2 (1-3)            | 1 (0-2)    | 2 (1-3.75) | 1 (1-1.75)             | 1.5 (0.75-2.25)                   | 0.007   |
| 3 ETT                   | 2 (2-4)            | 3 (2-3)    | 3 (2-4)    | 2 (2-3)                | 2 (2-3.5)                         | 0.083   |
| 4 TC                    | 2 (2-4)            | 3 (2-4)    | 3 (2-4)    | 2 (2-2)                | 2 (2-3)                           | 0.012   |
| 5 NIV                   | 2 (2-4)            | 2 (2-3)    | 2 (2-4)    | 2 (1-2)                | 2 (2-3)                           | 0.073   |
| 6 CRRT                  | 2.5 (2-4)          | 3 (1.5-3)  | 2 (2-4)    | 3 (2-3)                | 2 (2-2.75)                        | 0.693   |
| 7 Delirium              | 2 (1.25-4)         | 2 (1-3)    | 3 (2-4)    | 2 (1-2)                | 3 (2-3)                           | 0.012   |
| 8 FiO <sub>2</sub> 0.8  | 2 (2-4)            | 2 (2-3.5)  | 3 (2-4)    | 2 (1-2)                | 3 (2-4)                           | 0.080   |
| 9 Vasopressor           | 2 (1-3)            | 1 (0-1.5)  | 2 (1-3)    | 2 (1-2.75)             | 4 (2-4)                           | 0.020   |
| 10 SAB                  | 2 (1-3)            | 1 (0-2)    | 2 (1-3)    | 2 (1-2.75)             | 3 (2-3)                           | 0.028   |

a Data are reported in Median (Interquartile Range)

b includes Respiratory Therapists, Speech and Swallow Therapists, Occupational Therapists

Abbreviations: CRRT Continuous Renal Replacement Therapy, ETT Endotracheal Tube, FiO<sub>2</sub> Fraction of Oxygen, ICU Intensive Care Unit, SAB Sub Arachnoid Bleeding, TC Tracheal Cannula

## Appendix 4 - Mixed model – ANOVA calculation

ANOVA over all scenarios with all factors included.

| Variable                | F-value | p-value | Significance |
|-------------------------|---------|---------|--------------|
| (Intercept)             | 50.5    | <0.001  | ***          |
| Profession              | 5.3     | 0.001   | **           |
| Knowledge S2e guideline | 9.7     | 0.002   | **           |
| Expert                  | 3.9     | 0.049   | *            |
| Geographical Area       | 1.8     | 0.179   |              |
| Age                     | 1.3     | 0.290   |              |
| Work experience         | 1.0     | 0.428   |              |
| <b>Protocol for</b>     |         |         |              |
| ... mobilization        | 1.0     | 0.321   |              |
| ... daily Goals         | 0.6     | 0.428   |              |
| ... sedation            | 0.3     | 0.569   |              |
| ... orders              | 0.2     | 0.635   |              |
| ... delirium            | 0.1     | 0.782   |              |
| ... weaning             | 0.1     | 0.804   |              |
| ... analgesia           | 0.0     | 0.893   |              |
| <b>Scenario factor</b>  |         |         |              |
| Consciousness           | 90.3    | <0.001  | ***          |
| Hemodynamic instability | 836.4   | <0.001  | ***          |
| Pulmonary instability   | 178.6   | <0.001  | ***          |
| ETT                     | 297.4   | <0.001  | ***          |
| TC                      | 66.6    | <0.001  | ***          |
| NIV                     | 19.5    | <0.001  | ***          |
| CRRT                    | 61.6    | <0.001  | ***          |
| Neurocritical           | 1581.2  | <0.001  | ***          |

\*  $p \leq 0.05$ . \*\*  $p \leq 0.01$ . \*\*\*  $p \leq 0.001$ . \*\*\*\*  $p \leq 0.0001$



## Appendix 5 - Barriers

| Barriers <sup>a</sup> / Profession (n,%) | Physicians (n=48) | Nurses (n=370) | Physical Therapists (n=78) | Other Specialist <sup>b</sup> (n=15) | Total (n=515) |
|------------------------------------------|-------------------|----------------|----------------------------|--------------------------------------|---------------|
| Hemodynamic / pulmonary instability      | 30 (62.5)         | 252 (68.1)     | 62 (74.7)                  | 6 (42.9)                             | 350 (67.9)    |
| Lack of nurses                           | 19 (39.6)         | 226 (61.1)     | 20 (24.1)                  | 6 (42.9)                             | 271 (52.6)    |
| Deep sedation                            | 20 (41.7)         | 147 (39.7)     | 53 (63.9)                  | 8 (57.1)                             | 228 (44.3)    |
| Lack of knowledge                        | 11 (22.9)         | 87 (23.5)      | 8 (9.6)                    | 2 (14.3)                             | 108 (20.9)    |
| Missing culture                          | 15 (31.3)         | 73 (19.7)      | 14 (16.9)                  | 1 (7.1)                              | 103 (20)      |
| Lack of Physical Therapists              | 12 (25)           | 76 (20.5)      | 9 (10.8)                   | 2 (14.3)                             | 99 (19.2)     |
| Unwillingness to change behavior         | 8 (16.7)          | 63 (17)        | 12 (14.5)                  | 3 (21.4)                             | 86 (16.7)     |
| Safety concerns                          | 6 (12.5)          | 62 (16.8)      | 14 (16.9)                  | 3 (21.4)                             | 85 (16.5)     |
| Hyperactive delirium                     | 14 (29.2)         | 45 (12.2)      | 21 (25.3)                  | 0 (0)                                | 80 (15.5)     |
| Missing equipment                        | 3 (6.3)           | 49 (13.2)      | 10 (12)                    | 1 (7.1)                              | 63 (12.2)     |
| Lines and tubes                          | 7 (14.6)          | 35 (9.5)       | 7 (8.4)                    | 0 (0)                                | 49 (9.5)      |
| Interprofessional communication          | 5 (10.4)          | 17 (4.6)       | 10 (12)                    | 4 (28.6)                             | 36 (6.9)      |
| Missing protocol                         | 3 (6.3)           | 25 (6.8)       | 4 (4.8)                    | 1 (7.1)                              | 33 (6.4)      |
| Missing daily goals                      | 3 (6.3)           | 26 (7)         | 3 (3.6)                    | 1 (7.1)                              | 33 (6.4)      |
| Missing support                          | 1 (2.1)           | 20 (5.4)       | 6 (7.2)                    | 1 (7.1)                              | 28 (5.4)      |
| Lack of therapists                       | 5 (10.4)          | 16 (4.3)       | 1 (1.2)                    | 1 (7.1)                              | 23 (4.5)      |
| Missing interprofessional rounds         | 2 (4.2)           | 10 (2.7)       | 5 (6)                      | 0 (0)                                | 17 (3.3)      |
| Unclear responsibilities                 | 1 (2.1)           | 6 (1.6)        | 4 (4.8)                    | 1 (7.1)                              | 12 (2.3)      |
| Early discharge                          | 1 (2.1)           | 4 (1.1)        | 1 (1.2)                    | 0 (0)                                | 6 (1.2)       |
| Lack of physicians                       | 0 (0)             | 3 (0.8)        | 0 (0)                      | 2 (14.3)                             | 5 (1)         |

Data are reported in number (percent)

<sup>a</sup> Participants were asked to choose the three most important barriers

<sup>b</sup> includes Respiratory Therapists, Speech and Swallow Therapists, Occupational Therapists
